# Supplementary material for: Matrix metalloproteinase 7 contributes to intestinal barrier dysfunction by degrading tight junction protein Claudin-7
Source: PubMed Central journal article supplement (PMC9581388; doi:10.3389/fimmu.2022.1020902), 2022-10-04
Supplement: DataSheet_1.pdf [file DataSheet_1.pdf]

Supplemental material

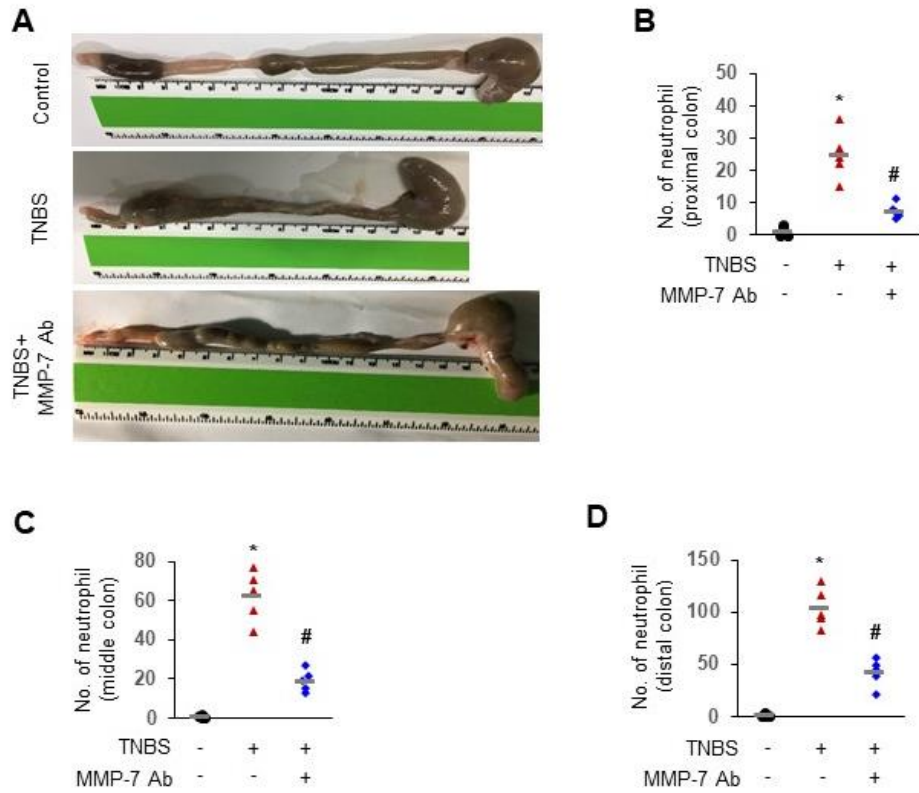

**Figure S1. Anti-MMP-7 antibody ameliorates colon shortening and neutrophil infiltration in rats treated with TNBS. (A)** Representative images of the rat colons. **(B)** Numbers of neutrophils in the proximal colons of all 3 groups of rats. **(C)** Numbers of neutrophils in the middle colons. **(D)** Numbers of neutrophils in the distal colons.

**Table S1. Primers used in SYBRGreen-based RT-qPCR.**

| Gene name           | Primer name | Primer sequence              |
|---------------------|-------------|------------------------------|
| Human <i>MMP7</i>   | MMP7-F      | 5'-ACCAACTGGCCCTAAAAGGATT-3' |
|                     | MMP7-R      | 5'-AGAGGAATGTCCCATACCCA-3'   |
| Human <i>GAPDH</i>  | GAPDH-F     | CCAGCAAGAGCACAAAGAGGA        |
|                     | GAPDH-R     | GAGATTCAGTGTGGTGGGGG         |
| Rat <i>Mmp7</i>     | Mmp7-F      | CTCTCTGGGTCTGGGTCACT         |
|                     | Mmp7-R      | AAGGGCGTTTGCTCATTCCA         |
| Rat <i>Gapdh</i>    | Gapdh-F     | ACAGCAACAGGGTGGTGGAC         |
|                     | Gapdh-R     | TTTGAGGGTGCAGCGAACTT         |
| Mouse <i>Mmp7</i>   | mmp7-F      | CTAGGCGGAGATGCTCACTTT        |
|                     | mmp7-R      | AATTCATGGGTGGCAGCAAAC        |
| Mouse <i>Il1b</i>   | Il1b-F      | TTTCGTGAATGAGCAGACAGC        |
|                     | Il1b-R      | GTTTCTTG TGACCCTGAGCGA       |
| Mouse <i>Il6</i>    | Il6-F       | ACAAAGCCAGAGTCCTTCAGAG       |
|                     | Il6-R       | GGGAAGCACTCACCTCTTGG         |
| Mouse <i>Il18</i>   | Il18-F      | ACCCTCTCTGTGAAGGATAGTA       |
|                     | Il18-R      | CAAACCCATCTTGTGTGTCC         |
| Mouse <i>Gapdh</i>  | gapdh-F     | CGTGTTCCACCCCAATGT           |
|                     | gapdh-R     | TCAGATGCCTGCTTACCAC          |
| Mouse <i>Mmp3</i>   | mmp3-F      | TTGACTCAAGGGTGGATGCT         |
|                     | mmp3-R      | CAACTGCCAAGATCCACTGA         |
| Mouse <i>Mmp9</i>   | mmp9-F      | GAGTTCTCTGGTGTGCCCTG         |
|                     | mmp9-R      | TTGGAAACTCACACGCCAGA         |
| Mouse <i>Muc2</i>   | muc2-F      | TCCCGACTTCAACCCAAGTG         |
|                     | muc2-R      | GACGGAGACAGCAGAGCAAG         |
| Mouse <i>Muc3</i>   | muc3-F      | CCAGCCTTCCCTAAACCACATAA      |
|                     | muc3-R      | GCTAAACACGCTTCTCCTCA         |
| Mouse <i>Muc4</i>   | muc4-F      | CTGCGCATCCTTACCATCTA         |
|                     | muc4-R      | GATCCCGTAGAATGCCCAAG         |
| Mouse <i>Nlrp3</i>  | nlrp3-F     | CAGAAGCTGGGGTTGGTGAA         |
|                     | nlrp3-R     | AGTTTACAGTCCGGGTGCAG         |
| Mouse <i>Ocln</i>   | ocln-F      | ACATGGCTGCTGCTGATGAA         |
|                     | ocln-R      | CCGTCTGTCATAATCTCCCACC       |
| Mouse <i>Tjp1</i>   | tjp1-F      | TGAGCCCCCTAGTGATGTGT         |
|                     | tjp1-R      | GCAAAAGACCAACCGTCAGG         |
| Mouse <i>Tnfa</i>   | tnfa-F      | CTTCCTCACAGAGCCAGCC          |
|                     | tnfa-R      | AAGACAGCTTCCCACACTGG         |
| Mouse <i>Ctnnb1</i> | ctnnb1-F    | CGAATGGATCACAAGATGGCG        |
|                     | ctnnb1-R    | AAGCAAAGTCAGCACCCTA          |
| Mouse <i>Cdh1</i>   | cdh1-F      | GGGACAGCAACATCAGCGAA         |
|                     | cdh1-R      | GGATAGGTCTCACCGCTGT          |
| Mouse <i>Cldn1</i>  | cldn1-F     | TGCAAAGATGTTTTGCCACAG        |
|                     | cldn1-R     | ATTTGTGTAGTTTGGCAAGTATCA     |
| Mouse <i>Cldn7</i>  | cldn7-F     | CTGCAACTGCTGGGCTTTTC         |
|                     | cldn7-R     | GGCTGTGATGATGTTGTGCG         |
| Mouse <i>Cldn8</i>  | cldn8-F     | TAGTCCAGACCTCCAGGCAT         |
|                     | cldn8-R     | CATTCCGAGGATGGCTGTCA         |
| Mouse <i>Cldn13</i> | cldn13-F    | TGCATTGAGACCCCTAGTGC         |
|                     | cldn13-R    | AGTTTTCCCCTCCAGACGTG         |
| Mouse <i>Cldn15</i> | cldn15-F    | GATCACCGCCATCCTCCTG          |
|                     | cldn15-R    | AGATCCATGTTGCCACGTT          |
| Mouse <i>Rn18S</i>  | rn18s-F     | GTAACCCGTTGAACCCATT          |
|                     | rn18s-R     | CCATCCAATCGGTAGTAGCG         |
